# Supplementary material for: Language of Healthcare: Chain of Education to Reduce Barriers
Source: Research Square preprint supplement (doi:10.21203/rs.3.rs-8007732/v1), 2025-12-22

Figures representing the charts of the remaining survey questions and answers of the participants.

I voluntarily agree to participate in this research study and fill out the following survey:

39 responses

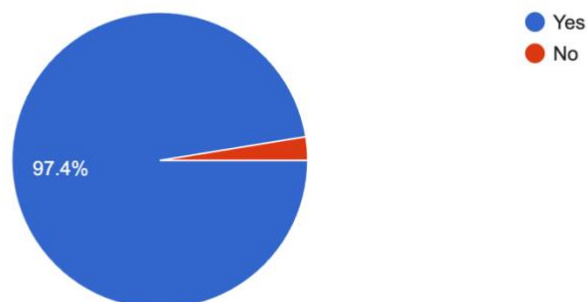

الجنس Gender

82 responses

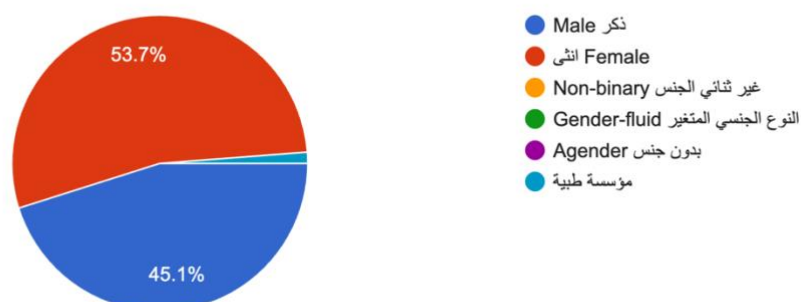

ما هي سنة دراستك الحالية؟ What is your current year of study?

82 responses

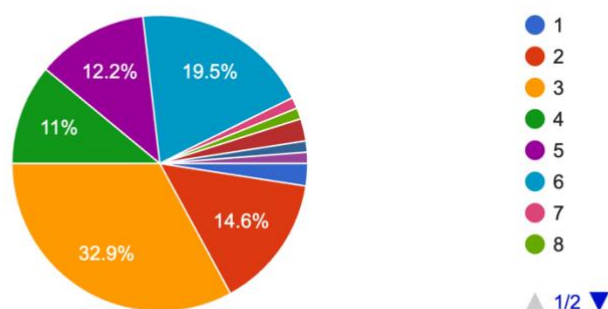

1/2

What is your current year of study?

ما هي سنة دراستك الحالية؟

82 responses

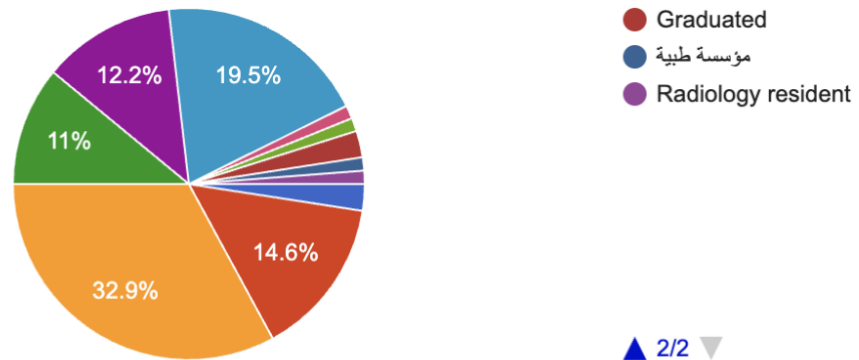

I have noticed a change/improvement in my test grades since watching the translated videos of Osmosis from Elsevier (1=strongly disagree and 9=strongly agree... لا أتفق أبداً دة مقاطع الفيديو المترجمة... 9 = أتفق تماماً 1 = لا أتفق تماماً)

82 responses

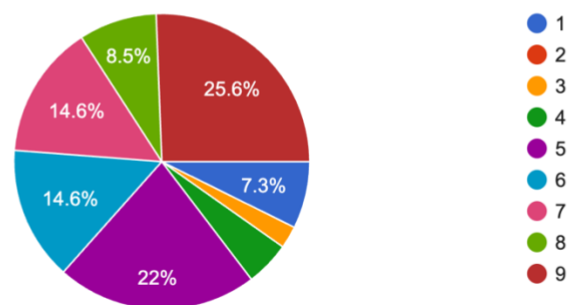

82 responses

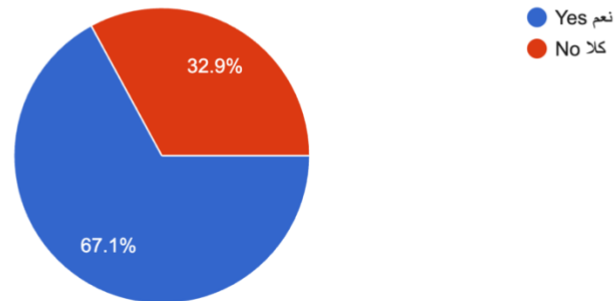

82 responses

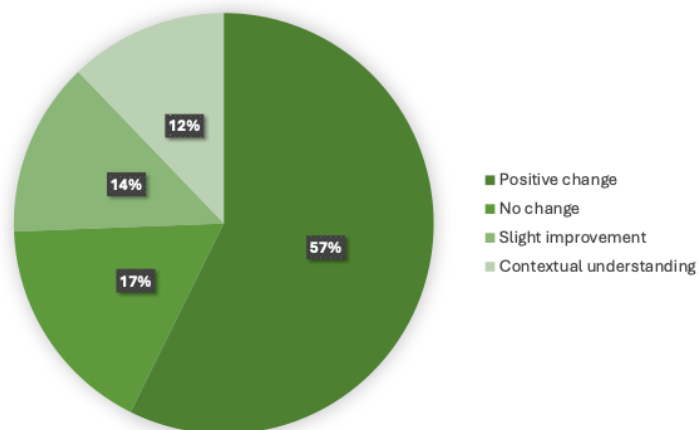

Can you provide examples of moments when the use of subtitles influenced your learning experience? هل يمكنك تقديم أمثلة على المواقف التي أثر فيها استخدام الترجمة الكتابية على تجربتك التعليمية؟

82 responses

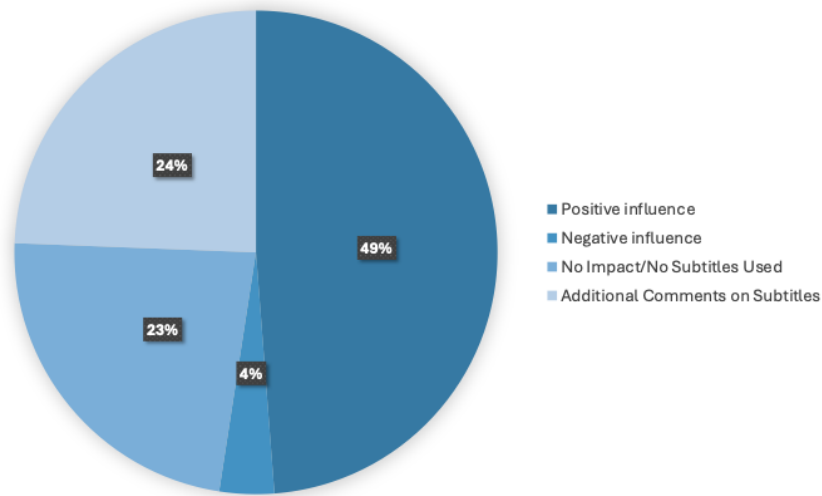

How far are you in your studies?

### 1. Undergraduate

- University student: 12
- Undergraduate student: 2
- Bachelor's degree: 4
- Second-year undergraduate student: 2
- Third-year student (Year 3): 6
- Fourth-year student: 2
- Senior student: 2
- Final year of bachelor's degree: 1
- Senior nursing student: 2

### 2. Postgraduate

- Graduated: 3
- Resident: 2
- Master's degree: 1

### Medical Studies

- First-year medical student:
- Second-year medical student
- Third-year medical student
- Fourth-year MS
- Fifth-year medical student
- Sixth medical year
- Mid medical school

- Doctor of Medicine candidate

When did you start watching (Osmosis from Elsevier) videos?

متى بدأت في مشاهدة مقاطع فيديو

(Osmosis from Elsevier)

82 responses

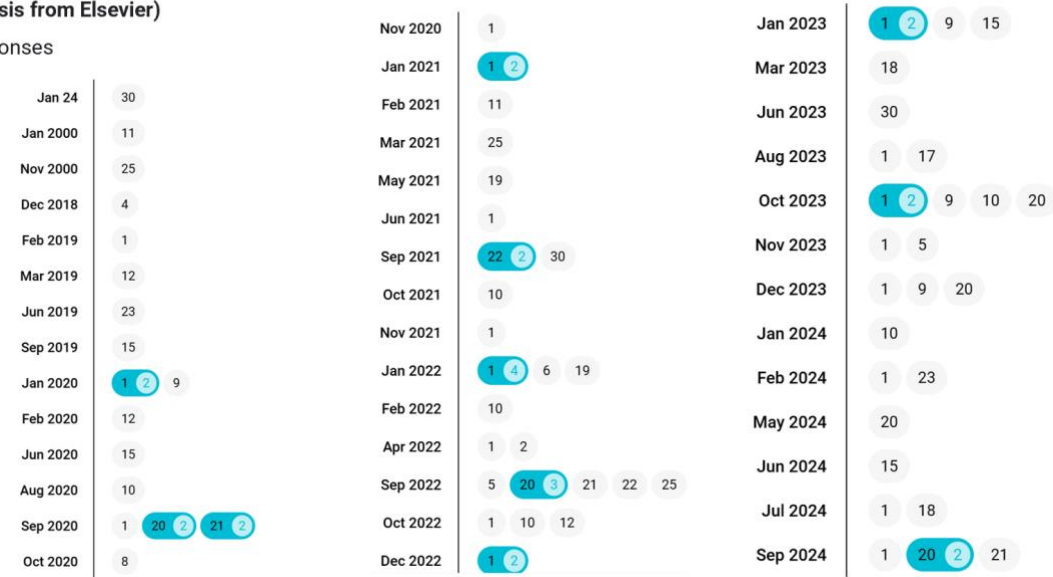

## How Participants Incorporated Captioned Osmosis Videos

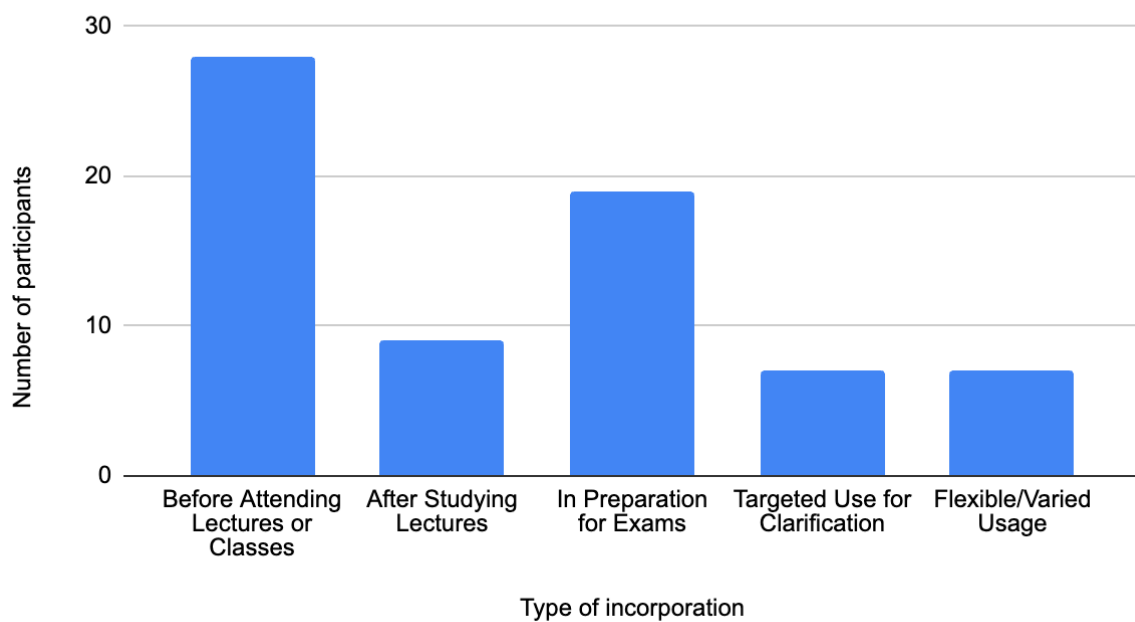

Supplement: Supplementary file 1 [file 2e1974f122ff01a8f06cf414.pdf]
