# Supplementary material for: Language of Healthcare: Chain of Education to Reduce Barriers
Source: Research Square preprint supplement (doi:10.21203/rs.3.rs-8007732/v1), 2025-12-22
Supplement: Supplementary file 1 [file 1e373dfa1454fb3ed20b3ec7.docx]

**Appendix 1: Consent Document and Survey Items**

**INFORMED CONSENT:**

We would like to invite you to participate in a research project by completing the following questionnaire on the impact of Osmosis from Elsevier Chain of Education Arabic subtitles on the healthcare community. The purpose of this research is to study the impact of Osmosis from Elsevier Chain of Education Arabic subtitled in Arabic-speaking countries to advance tools to empower more Arabic-speaking students. You need to be a university student majoring in a health sciences major (like medicine, nursing, pharmacy, density, nutrition, and premed) to be qualified to participate in this study. If you agree to participate, you will need to answer all questions and choose the answer that most closely resembles your situation.

There are no known risks, harms, or discomforts associated with this study beyond those encountered in normal daily life. Additionally, you will not directly benefit from participation in this study.

This study will involve around 100 participants. The questionnaire includes 18 questions and takes about 7 minutes to be completed. Moreover, it consists of a combination of multiple-choice and free-text questions.

No information that helps identify your identity will be collected.

By continuing with the questionnaire, you agree with the following statements:

1. I have been given sufficient information about this research project.

2. I understand that my answers will not be released to anyone, and my identity will remain anonymous. My name will not be written on the questionnaire nor be kept in any other records.

3. When the results of the study are reported, I will not be identified by name or any other information that could be used to infer my identity. Only researchers will have access to view any data collected during this research however data cannot be linked to me.

4. I understand that I may withdraw from this research any time I wish and that I have the right to skip any question I don't want to answer.

5. I understand that my refusal to participate will not result in any penalty or loss of benefits to which I otherwise am entitled.

6. I have been informed that the research abides by all commonly acknowledged ethical codes and that the research project has been reviewed and approved by the Institutional Review Board at the Lebanese American University.

7. I understand that if I have any additional questions, I can ask any member of the research team listed below.

8. I have read and understood all statements on this form.

9. I voluntarily agree to take part in this research project by completing the following questionnaire.

Your participation and support are invaluable to the success of our research study. Together, let's empower and strengthen our Arabic-speaking healthcare community. Thank you in advance for your time and contribution.

If you have any questions, you may reach out to any of the below researchers:

Dr. Amin Azzam, MD, MA Email: Amin.Azzam@ucsf.edu

Mohamad Kabakibi, BS. Email: mdkabakibi@gmail.com

Yasin Jazieh, RN, BSN Email: ykj02@aub.edu.lb

Perla Nafeh. Email: perla.nafeh@lau.edu

*If you have any questions about your rights as a participant in this study, or you want to talk to someone outside the research, please contact the: Institutional Review Board Office,*

*Lebanese American University*

*3rd Floor, Dorm A,*

*Byblos Campus*

*Tel: 00 961 1 786456 ext. (2546)*

*irb@lau.edu.lb*

**This study has been reviewed and approved by the LAU IRB, and the IRB tracking number is "LAU.SAS.HH1.21/Aug/2024".**

I voluntarily agree to participate in this research study and fill out the following survey:

- Yes
- No

1- Age العمر

2- How many languages do you speak? عدد اللغات التي تجيدها

- 1
- 2
- 3
- Other:

3- Gender الجنس

- Male ذكر
- Female أنثى
- Non-binary غير ثنائي الجنس
- Gender-fluid النوع الجنسي المتغير
- Agender بدون جنس
- Other:

4- What is your program of study?

ما هو برنامج دراستك؟

- Medicine (MD or MBBS) طب
- Pharmacy صيدلة
- Nursing تمريض
- Nutrition and Dietetic علم التغذية
- Premed تحضير للطب
- Physician Assistant مساعد طبيب
- Dentistry طب اسنان
- Other:

5- What is your current year of study?

ما هي سنة دراستك الحالية؟

- 1
- 2
- 3
- 4
- 5
- 6
- 7
- 8
- Other:

6- Have you ever watched the translated videos of **(Osmosis from Elsevier)** from English to Arabic?

هل سبق لك أن شاهدت مقاطع الفيديو ل (Osmosis from Elsevier) المترجمة من الإنجليزية إلى العربية؟

- Yes نعم
- No كلا

7- When did you start watching **(Osmosis from Elsevier)** videos?

متى بدأت في مشاهدة مقاطع فيديو **Osmosis from Elsevier؟**

8- On average, how much time do you spend watching Osmosis videos per week?

في المتوسط، كم من الوقت تقضيه أسبوعيًا في مشاهدة هذه الفيديوهات؟

- Less than a minute (أقل من دقيقة)
- 1 to 2:59 minutes (1 إلى 2:59 دقيقة)
- 3 to 4:59 minutes (3 إلى 4:59 دقيقة)
- 5 to 6:59 minutes (5 إلى 6:59 دقيقة)
- 7 to 8:59 minutes (7 إلى 8:59 دقيقة)
- 9 to 10:59 minutes (9 إلى 10:59 دقيقة)
- 11 to 12:59 minutes (11 إلى 12:59 دقيقة)
- 13 to 15:59 minutes (13 إلى 15:59 دقيقة)
- 16 minutes and more (16 دقيقة وأكثر)

9- How many times do you watch or rewatch the video?

كم مرة تشاهد أو تعيد مشاهدة الفيديو؟

- 1
- 2
- 3
- 4
- 5
- 6
- Other:

10- How many times do you read the captions of the video?

كم مرة تقرأ ترجمة الفيديو؟

- 1
- 2
- 3
- 4
- 5
- 6
- Other:

11- On a scale from 1 to 9, have you noticed any improvement in your understanding of healthcare concepts after watching the translated videos of Osmosis from Elsevier? (1= strongly disagree and 9= strongly agree)

على مقياس من 1 إلى 9، هل لاحظت أي تحسن في فهم مفاهيم الرعاية الصحية بعد مشاهدة مقاطع الفيديو المترجمة؟


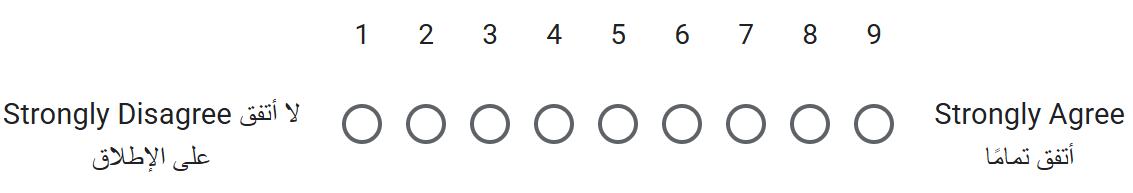


12- How do you usually incorporate translated videos of Osmosis from Elsevier into your study routine (before studying the lectures, after studying the lectures, before attending the classes, in preparation for the exam)? Free text.

كيف تدمج عادة مقاطع الفيديو المترجمة من في روتين دراستك (قبل دراسة المحاضرات، بعد دراسة المحاضرات، قبل حضور الدروس، في التحضير للامتحان)؟

13- I have noticed a change/improvement in my test grades since watching the translated videos of Osmosis from Elsevier (1=strongly disagree and 9=strongly agree).

لقد لاحظت تغييرًا/تحسنًا في درجات الاختبار منذ مشاهدة مقاطع الفيديو المترجمة

١= لا أتفق أبدا

٩= أتفق تماماً


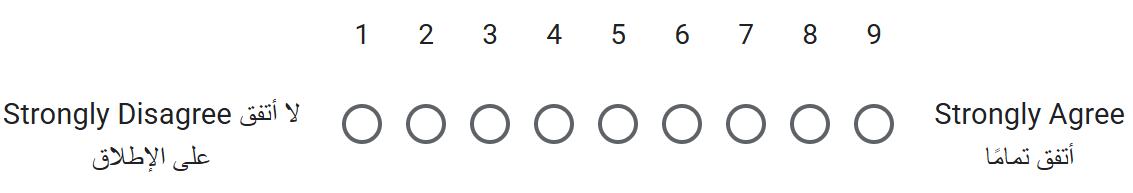


14- If yes, what is the change that you noticed? If not, explain.

إذا كان الجواب نعم، ما هو التغيير الذي لاحظته؟ إذا كان الجواب لا، فضلاً علّل التوضيح.

15- What other resources do you use?

ما هي المصادر الأخرى التي تستخدمها؟

16- Describe any change in your test grades you observed so farز

صف أي تغيير في درجات الاختبار لاحظته حتى الآن

17- Can you provide examples of moments when the use of subtitles influenced your learning experience?

هل يمكنك تقديم أمثلة على المواقف التي أثر فيها استخدام الترجمة الكتابية على تجربتك التعليمية؟

18- Do you plan to continue using Osmosis with Arabic subtitles in the future for your academic studies? If yes, what aspects of Osmosis from Elsevier with Arabic subtitles make you inclined to continue using it?

هل تنوي الاستمرار في استخدام الفيديوهات مع ترجمة عربية في المستقبل دراستك الأكاديمية؟ إذا كان الجواب نعم، ما هي الجوانب الايجابية التي تجعلك ميالًا للاستمرار في استخدامها؟
